# Supplementary material for: “Outside the Skin”: The Persistence of Black–White Disparities in U.S. Early-Life Mortality
Source: Oxford University Press journal article supplement (doi:10.1215/00703370-10346963), 2022-11-11
Supplement: tilstra_esm.pdf [file tilstra_esm.pdf]

“Outside the Skin:” The Persistence of Black-White Disparities in U.S. Early-Life Mortality

Andrea M. Tilstra\*, University of Oxford, [Andrea.Tilstra@sociology.ox.ac.uk](mailto:Andrea.Tilstra@sociology.ox.ac.uk);

Iliya Gutin\*, University of Texas – Austin, [iliya.gutin@austin.utexas.edu](mailto:iliya.gutin@austin.utexas.edu);

Nathan T. Dollar, University of North Carolina – Chapel Hill; [ntdollar@live.unc.edu](mailto:ntdollar@live.unc.edu);

Richard G. Rogers, University of Colorado Boulder; [Richard.rogers@colorado.edu](mailto:Richard.rogers@colorado.edu);

Robert A. Hummer, University of North Carolina – Chapel Hill, [rhummer@email.unc.edu](mailto:rhummer@email.unc.edu)

\*Authors contributed equally to this work.

- I. Figure S1. United States All Cause Age-Specific Mortality Rates, Ages 15-24, 1990-2016
- II. Figure S2. United States All Cause Age-Specific Mortality Ratios, Ages 15-24, 1990-2016

Figure S1. United States All Cause Age-Specific Mortality Rates, Ages 15-24, 1990-2016

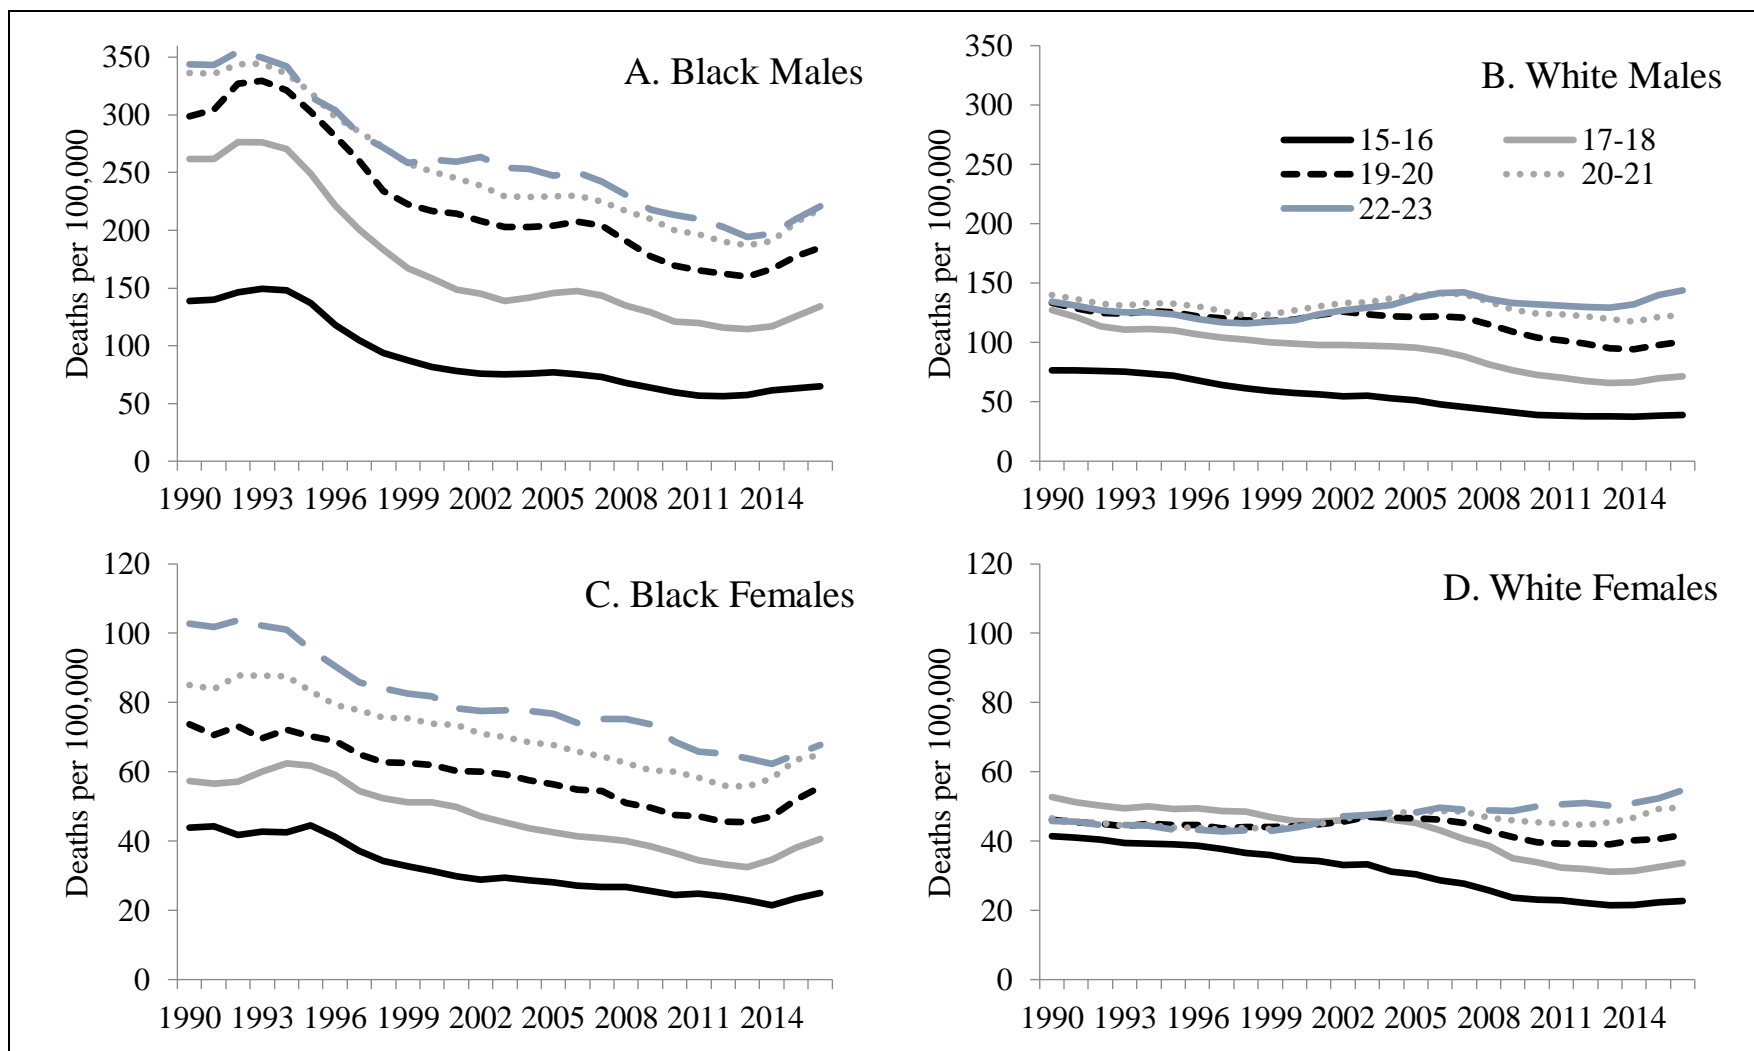

Notes: Data come from National Vital Statistics System mortality files and Surveillance, Epidemiology, and End Result Program population counts. Three-year moving averages.

Figure S2. United States All Cause Age-Specific Mortality Ratios, Ages 15-24, 1990-2016

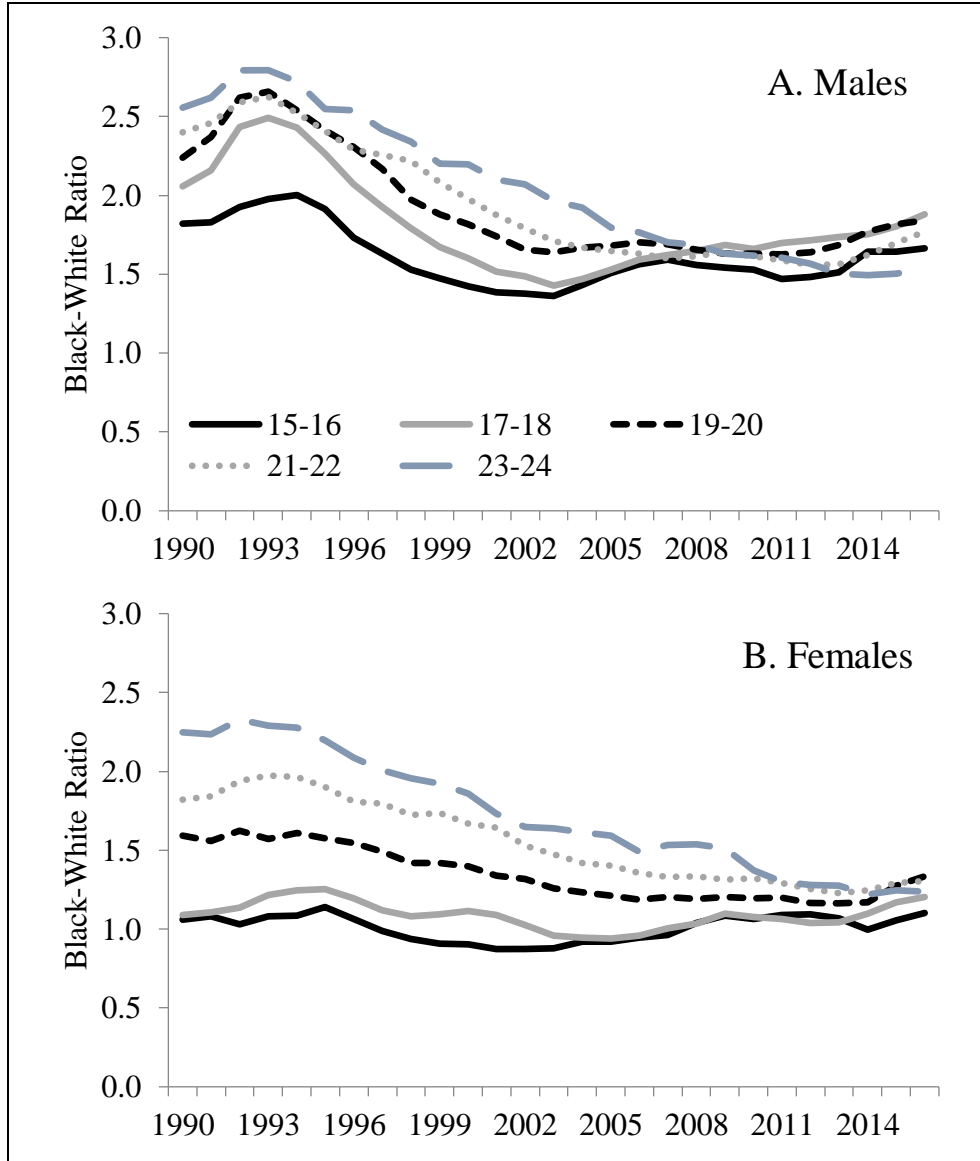

*Notes:* Data come from National Vital Statistics System mortality files and Surveillance, Epidemiology, and End Result Program population counts. Three-year moving averages.
